# Supplementary material for: The effect of chronic progressive-dose sodium bicarbonate ingestion on CrossFit-like performance: A double-blind, randomized cross-over trial
Source: PubMed Central journal article supplement (PMC5957406; doi:10.1371/journal.pone.0197480), 2018-05-17
Supplement: pone.0197480.s003.pdf [file pone.0197480.s003.pdf]

**S1 Table. Baseline characteristics of the participating athletes (N = 21 subjects).**

|                  | <b>SB<sub>pre</sub></b> | <b>PLA<sub>pre</sub></b> | <i>p value</i> <sup>a</sup><br>Baseline (SB vs. PLA) |
|------------------|-------------------------|--------------------------|------------------------------------------------------|
| Age (yr)         |                         | 32 ± 5                   | -                                                    |
| Body height (cm) |                         | 174 ± 8                  | -                                                    |
| Body mass (kg)   | 73.0 ± 14.0             | 73.2 ± 13.8              | 0.455                                                |
| FM (kg)          | 13.6 ± 4.9              | 13.9 ± 4.9               | 0.075                                                |
| FFM (kg)         | 58.4 ± 13.4             | 59.3 ± 13.7              | 0.140                                                |
| TBW (L)          | 44.7 ± 10.2             | 44.3 ± 9.6               | 0.509                                                |

Data are mean ± SD. SB, sodium bicarbonate; PLA, placebo; FM, fat mass; FFM, fat free mass; TBW, total body water content. <sup>a</sup> Depending on the data distribution (normal; not normal): one side paired t-Student test or the Wilcoxon test.
