# Supplementary material for: The effect of chronic progressive-dose sodium bicarbonate ingestion on CrossFit-like performance: A double-blind, randomized cross-over trial
Source: PubMed Central journal article supplement (PMC5957406; doi:10.1371/journal.pone.0197480), 2018-05-17
Supplement: pone.0197480.s005.pdf [file pone.0197480.s005.pdf]

**S3 Table. Gastrointestinal side effects during SB and PLA supplementation.**

|                   | SB trial  |           |           |           |           | PLA trial |           |            |           |           |
|-------------------|-----------|-----------|-----------|-----------|-----------|-----------|-----------|------------|-----------|-----------|
|                   | day 1     | day 3     | day 5     | day 8     | day 10    | day 1     | day 3     | day 5      | day 8     | day 10    |
| Stomach problems  | 1.0 ± 1.0 | 1.0 ± 1.0 | 1.0 ± 1.2 | 0.5 ± 0.9 | 0.3 ± 0.7 | 1.0 ± 1.3 | 0.5 ± 0.8 | 0.7 ± 1.0  | 0.5 ± 0.9 | 0.4 ± 0.7 |
| Nausea            | 0.3 ± 0.6 | 0.3 ± 0.6 | 0.2 ± 0.5 | 0.1 ± 0.5 | 0.1 ± 0.3 | 0.2 ± 0.4 | 0.4 ± 0.6 | 0.2 ± 0.5  | 0.3 ± 0.6 | 0.2 ± 0.5 |
| Dizziness         | 0.1 ± 0.3 | 0.2 ± 0.4 | 0.1 ± 0.3 | 0.0 ± 0.2 | 0.0 ± 0.0 | 0.2 ± 0.4 | 0.1 ± 0.4 | 0.2 ± 0.4  | 0.1 ± 0.3 | 0.1 ± 0.3 |
| Headache          | 0.6 ± 0.5 | 0.6 ± 1.0 | 0.6 ± 1.1 | 0.4 ± 0.8 | 0.5 ± 0.9 | 0.5 ± 0.9 | 0.5 ± 0.9 | 0.3 ± 0.8  | 0.2 ± 0.6 | 0.3 ± 0.8 |
| Flatulence        | 0.3 ± 0.6 | 0.1 ± 0.5 | 0.2 ± 0.4 | 0.2 ± 0.4 | 0.2 ± 0.4 | 0.2 ± 0.5 | 0.2 ± 0.4 | 0.3 ± 0.5  | 0.2 ± 0.4 | 0.1 ± 0.4 |
| Urge to urinate   | 0.3 ± 0.6 | 0.1 ± 0.4 | 0.4 ± 0.5 | 0.1 ± 0.4 | 0.1 ± 0.3 | 0.2 ± 0.4 | 0.3 ± 0.6 | 0.2 ± 0.4  | 0.2 ± 0.4 | 0.1 ± 0.4 |
| Urge to defecate  | 0.4 ± 0.7 | 0.4 ± 0.7 | 0.3 ± 0.6 | 0.1 ± 0.4 | 0.4 ± 0.9 | 0.5 ± 1.0 | 0.5 ± 1.0 | 0.5 ± 1.0  | 0.5 ± 0.9 | 0.2 ± 0.5 |
| Belching          | 0.4 ± 1.0 | 0.5 ± 0.8 | 0.3 ± 0.6 | 0.2 ± 0.5 | 0.3 ± 0.6 | 0.2 ± 0.5 | 0.1 ± 0.4 | 0.2 ± 0.4  | 0.4 ± 0.7 | 0.1 ± 0.5 |
| Heartburn         | 0.3 ± 0.6 | 0.3 ± 0.6 | 0.5 ± 0.9 | 0.1 ± 0.5 | 0.1 ± 0.4 | 0.4 ± 0.7 | 0.2 ± 0.6 | 0.0 ± 0.2  | 0.1 ± 0.5 | 0.2 ± 0.6 |
| Bloating          | 0.4 ± 0.9 | 0.3 ± 0.6 | 0.6 ± 1.1 | 0.4 ± 0.8 | 0.2 ± 0.6 | 0.5 ± 0.9 | 0.4 ± 0.9 | 0.3 ± 0.7  | 0.4 ± 0.7 | 0.4 ± 0.8 |
| Stomach cramps    | 0.2 ± 0.4 | 0.1 ± 0.5 | 0.3 ± 0.8 | 0.2 ± 0.5 | 0.2 ± 0.8 | 0.3 ± 0.6 | 0.2 ± 0.5 | 0.5 ± 0.9  | 0.4 ± 0.8 | 0.3 ± 0.8 |
| Intestinal cramps | 0.4 ± 0.7 | 0.2 ± 0.4 | 0.1 ± 0.3 | 0.0 ± 0.2 | 0.1 ± 0.3 | 0.2 ± 0.2 | 0.1 ± 0.5 | 0.2 ± 0.4  | 0.2 ± 0.4 | 0.2 ± 0.5 |
| Urge to vomit     | 0.0 ± 0.0 | 0.0 ± 0.0 | 0.1 ± 0.3 | 0.0 ± 0.0 | 0.0 ± 0.0 | 0.0 ± 0.2 | 0.0 ± 0.2 | 0.0 ± 0.0  | 0.1 ± 0.3 | 0.1 ± 0.3 |
| Vomiting          | 0.0 ± 0.0 | 0.0 ± 0.0 | 0.0 ± 0.0 | 0.0 ± 0.0 | 0.0 ± 0.0 | 0.0 ± 0.0 | 0.0 ± 0.0 | 0.0 ± 0.0  | 0.0 ± 0.0 | 0.0 ± 0.0 |
| Diarrhea          | 0.5 ± 0.9 | 0.3 ± 0.6 | 0.3 ± 0.6 | 0.3 ± 0.8 | 0.2 ± 0.7 | 0.4 ± 0.9 | 0.3 ± 0.8 | 0.5 ± 1.0  | 0.3 ± 0.6 | 0.2 ± 0.4 |
| Side ache left    | 0.0 ± 0.0 | 0.0 ± 0.0 | 0.1 ± 0.3 | 0.0 ± 0.2 | 0.0 ± 0.2 | 0.0 ± 0.2 | 0.0 ± 0.2 | 0.0 ± 0.0  | 0.0 ± 0.2 | 0.0 ± 0.0 |
| Side ache right   | 0.0 ± 0.0 | 0.0 ± 0.0 | 0.0 ± 0.2 | 0.0 ± 0.0 | 0.1 ± 0.3 | 0.0 ± 0.0 | 0.0 ± 0.0 | 0.0 ± 0.0  | 0.0 ± 0.0 | 0.0 ± 0.0 |
| Muscle cramps     | 0.4 ± 0.8 | 0.1 ± 0.4 | 0.2 ± 0.5 | 0.2 ± 0.6 | 0.2 ± 0.6 | 0.5 ± 1.0 | 0.5 ± 0.9 | 0.2 ± 0.6  | 0.2 ± 0.6 | 0.2 ± 0.5 |
| Cold shivering    | 0.0 ± 0.0 | 0.0 ± 0.0 | 0.0 ± 0.2 | 0.0 ± 0.0 | 0.0 ± 0.0 | 0.0 ± 0.0 | 0.0 ± 0.0 | 0.0 ± 0.0s | 0.0 ± 0.0 | 0.0 ± 0.2 |

Data are mean ± SD. SB, sodium bicarbonate; PLA, placebo.
