# Supplementary material for: The effect of chronic progressive-dose sodium bicarbonate ingestion on CrossFit-like performance: A double-blind, randomized cross-over trial
Source: PubMed Central journal article supplement (PMC5957406; doi:10.1371/journal.pone.0197480), 2018-05-17
Supplement: pone.0197480.s006.pdf [file pone.0197480.s006.pdf]

**S4 Table. Heart rates in *Fight Gone Bad* test.**

|                           | <b>SB<sub>pre</sub></b> | <b>SB<sub>post</sub></b> | <b>PLA<sub>pre</sub></b> | <b>PLA<sub>post</sub></b> |
|---------------------------|-------------------------|--------------------------|--------------------------|---------------------------|
| Round 1 (bpm)             | 172 ± 11                | 166 ± 10                 | 167 ± 11                 | 168 ± 12                  |
| Break 1 (bpm)             | 163 ± 11                | 156 ± 11                 | 161 ± 10                 | 159 ± 11                  |
| Round 2 (bpm)             | 173 ± 9                 | 171 ± 10                 | 171 ± 9                  | 171 ± 10                  |
| Break 2 (bpm)             | 166 ± 11                | 163 ± 10                 | 165 ± 10                 | 165 ± 9                   |
| Round 3 (bpm)             | 174 ± 9                 | 172 ± 8                  | 171 ± 6                  | 173 ± 9                   |
| Break 3 (bpm)             | 167 ± 12                | 166 ± 8                  | 166 ± 8                  | 165 ± 16                  |
| <i>All 3 rounds (bpm)</i> | 172 ± 9                 | 169 ± 10                 | 169 ± 9                  | 169 ± 10                  |

Data are mean of average HR ± SD. HR, heart rate; SB, sodium bicarbonate; PLA, placebo.
